# Supplementary material for: Levodopa use in Australia: an analysis of Pharmaceutical Benefits Scheme 10% data
Source: PubMed Central journal article supplement — BMJ Neurol Open. 2024 Jan 18;6(1):e000484. doi: 10.1136/bmjno-2023-000484 (PMC10806810; doi:10.1136/bmjno-2023-000484), 2024-01-18
Supplement: bmjno-2023-000484supp001.pdf [file bmjno-2023-000484supp001.pdf]

Formatted for BMJ Neurology Open

Version 9.0

**S1 – PBS Item Codes**

| <b>ATC code</b> | <b>PBS item code</b> | <b>Drug</b>                    | <b>Medical product pack</b>                                                        |
|-----------------|----------------------|--------------------------------|------------------------------------------------------------------------------------|
| <b>N04AC01</b>  | 10013B               | Benztropine                    | benztropine mesylate 2 mg/2 mL injection, 10 x 2 mL vials                          |
| <b>N04AC01</b>  | 10016E               | Benztropine                    | benztropine mesylate 2 mg/2 mL injection, 10 x 2 mL vials                          |
| <b>N04AC01</b>  | 10027R               | Benztropine                    | benztropine mesylate 2 mg/2 mL injection, 10 x 2 mL vials                          |
| <b>N04AC01</b>  | 2362H                | Benztropine                    | benztropine mesylate 2 mg tablet, 60                                               |
| <b>N04AC01</b>  | 3038X                | Benztropine                    | benztropine mesylate 2 mg/2 mL injection, 5 x 2 mL ampoules                        |
| <b>N04AC01</b>  | 3457Y                | Benztropine Mesylate           | Injection 2 mg in 2 mL                                                             |
| <b>N04AC01</b>  | 5031T                | Benztropine                    | benztropine mesylate 2 mg/2 mL injection, 5 x 2 mL ampoules                        |
| <b>N04BA02</b>  | 1242J                | Levodopa + Carbidopa Anhydrous | levodopa 100 mg + carbidopa anhydrous 25 mg tablet, 100                            |
| <b>N04BA02</b>  | 1245M                | Levodopa + Carbidopa Anhydrous | levodopa 250 mg + carbidopa anhydrous 25 mg tablet, 100                            |
| <b>N04BA02</b>  | 1255C                | Levodopa + Carbidopa Anhydrous | levodopa 200 mg + carbidopa anhydrous 50 mg tablet: modified release, 100 tablets  |
| <b>N04BA02</b>  | 2225D                | Levodopa + Benserazide         | levodopa 100 mg + benserazide 25 mg capsule, 100                                   |
| <b>N04BA02</b>  | 2226E                | Levodopa + Benserazide         | levodopa 200 mg + benserazide 50 mg capsule, 100                                   |
| <b>N04BA02</b>  | 2227F                | Levodopa + Benserazide         | levodopa 50 mg + benserazide 12.5 mg capsule, 100                                  |
| <b>N04BA02</b>  | 2228G                | Levodopa + Benserazide         | levodopa 200 mg + benserazide 50 mg tablet, 100                                    |
| <b>N04BA02</b>  | 2229H                | Levodopa + Benserazide         | levodopa 100 mg + benserazide 25 mg tablet, 100                                    |
| <b>N04BA02</b>  | 2231K                | Levodopa + Benserazide         | levodopa 100 mg + benserazide 25 mg capsule: modified release, 100 capsules        |
| <b>N04BA02</b>  | 8218M                | Levodopa + Benserazide         | LEVODOPA with BENSERAZIDE Dispersible tablet 50 mg-12.5 mg, 100                    |
| <b>N04BA02</b>  | 8219N                | Levodopa + Benserazide         | LEVODOPA with BENSERAZIDE Dispersible tablet 100 mg-25 mg, 100                     |
| <b>N04BA02</b>  | 8970D                | Levodopa + Carbidopa Anhydrous | levodopa 20 mg/mL + carbidopa monohydrate 5 mg/mL gel: intestinal, 7 x 100 mL bags |
| <b>N04BA02</b>  | 9743T                | Levodopa + Carbidopa Anhydrous | levodopa 20 mg/mL + carbidopa monohydrate 5 mg/mL gel: intestinal, 7 x 100 mL bags |
| <b>N04BA02</b>  | 9744W                | Levodopa + Carbidopa Anhydrous | levodopa 20 mg/mL + carbidopa monohydrate 5 mg/mL gel: intestinal, 7 x 100 mL bags |

Formatted for BMJ Neurology Open

Version 9.0

|                |       |                                             |                                                                                          |
|----------------|-------|---------------------------------------------|------------------------------------------------------------------------------------------|
| <b>N04BA03</b> | 8797B | Levodopa + Carbidopa Anhydrous + Entacapone | levodopa 50 mg + carbidopa anhydrous 12.5 mg + entacapone 200 mg tablet, 100             |
| <b>N04BA03</b> | 8798C | Levodopa + Carbidopa Anhydrous + Entacapone | levodopa 100 mg + carbidopa anhydrous 25 mg + entacapone 200 mg tablet, 100              |
| <b>N04BA03</b> | 8799D | Levodopa + Carbidopa Anhydrous + Entacapone | levodopa 150 mg + carbidopa anhydrous 37.5 mg + entacapone 200 mg tablet, 100            |
| <b>N04BA03</b> | 9292C | Levodopa + Carbidopa Anhydrous + Entacapone | levodopa 200 mg + carbidopa anhydrous 50 mg + entacapone 200 mg tablet, 100              |
| <b>N04BA03</b> | 9344T | Levodopa + Carbidopa Anhydrous + Entacapone | levodopa 75 mg + carbidopa anhydrous 18.75 mg + entacapone 200 mg tablet, 100            |
| <b>N04BA03</b> | 9345W | Levodopa + Carbidopa Anhydrous + Entacapone | levodopa 125 mg + carbidopa anhydrous 31.25 mg + entacapone 200 mg tablet, 100           |
| <b>N04BB01</b> | 3016R | Amantadine                                  | amantadine hydrochloride 100 mg capsule, 100                                             |
| <b>N04BC01</b> | 1443Y | Bromocriptine                               | bromocriptine 2.5 mg tablet, 30                                                          |
| <b>N04BC01</b> | 1445C | Bromocriptine                               | bromocriptine 10 mg capsule, 100                                                         |
| <b>N04BC01</b> | 1446D | Bromocriptine                               | bromocriptine 5 mg capsule, 60                                                           |
| <b>N04BC01</b> | 1559C | Bromocriptine                               | bromocriptine 2.5 mg tablet, 60                                                          |
| <b>N04BC02</b> | 2808T | Pergolide                                   | pergolide 50 microgram tablet, 100                                                       |
| <b>N04BC02</b> | 2809W | Pergolide                                   | pergolide 250 microgram tablet, 100                                                      |
| <b>N04BC02</b> | 2810X | Pergolide                                   | pergolide 1 mg tablet, 100                                                               |
| <b>N04BC05</b> | 3418X | Pramipexole                                 | pramipexole hydrochloride monohydrate 375 microgram tablet: modified release, 30 tablets |
| <b>N04BC05</b> | 3419Y | Pramipexole                                 | pramipexole hydrochloride monohydrate 750 microgram tablet: modified release, 30 tablets |
| <b>N04BC05</b> | 3420B | Pramipexole                                 | pramipexole hydrochloride monohydrate 1.5 mg tablet: modified release, 30 tablets        |
| <b>N04BC05</b> | 3421C | Pramipexole                                 | pramipexole hydrochloride monohydrate 3 mg tablet: modified release, 30 tablets          |
| <b>N04BC05</b> | 3422D | Pramipexole                                 | pramipexole hydrochloride monohydrate 4.5 mg tablet: modified release, 30 tablets        |
| <b>N04BC05</b> | 5143Q | Pramipexole                                 | pramipexole hydrochloride monohydrate 2.25 mg tablet: modified release, 30 tablets       |
| <b>N04BC05</b> | 5145T | Pramipexole                                 | pramipexole hydrochloride monohydrate 3.75 mg tablet: modified release, 30 tablets       |
| <b>N04BC05</b> | 9151P | Pramipexole                                 | pramipexole hydrochloride monohydrate 125 microgram tablet, 30                           |
| <b>N04BC05</b> | 9152Q | Pramipexole                                 | pramipexole hydrochloride monohydrate 250 microgram tablet, 100                          |

Formatted for BMJ Neurology Open

Version 9.0

|                |        |                           |                                                                                            |
|----------------|--------|---------------------------|--------------------------------------------------------------------------------------------|
| <b>N04BC05</b> | 9153R  | Pramipexole               | pramipexole hydrochloride monohydrate 1 mg tablet, 100                                     |
| <b>N04BC06</b> | 8393R  | Cabergoline               | cabergoline 1 mg tablet, 30                                                                |
| <b>N04BC06</b> | 8394T  | Cabergoline               | cabergoline 2 mg tablet, 30                                                                |
| <b>N04BC06</b> | 8395W  | Cabergoline               | cabergoline tablet 4 mg                                                                    |
| <b>N04BC07</b> | 10227G | Apomorphine               | apomorphine hydrochloride 10 mg/mL injection, 5 x 1 mL ampoules                            |
| <b>N04BC07</b> | 10235Q | Apomorphine               | apomorphine hydrochloride 10 mg/mL injection, 5 x 1 mL ampoules                            |
| <b>N04BC07</b> | 5609F  | Apomorphine               | apomorphine hydrochloride 20 mg/2 mL injection, 5 x 2 mL ampoules                          |
| <b>N04BC07</b> | 5610G  | Apomorphine               | apomorphine hydrochloride 50 mg/5 mL injection, 5 x 5 mL ampoules                          |
| <b>N04BC07</b> | 5611H  | Apomorphine               | apomorphine hydrochloride 50 mg/10 mL injection: subcutaneous infusion, 5 x 10 mL syringes |
| <b>N04BC07</b> | 6104G  | Apomorphine Hydrochloride | Injection 10 mg in 1 mL                                                                    |
| <b>N04BC07</b> | 9607P  | Apomorphine               | apomorphine hydrochloride 20 mg/2 mL injection, 5 x 2 mL ampoules                          |
| <b>N04BC07</b> | 9640J  | Apomorphine               | apomorphine hydrochloride 50 mg/5 mL injection, 5 x 5 mL ampoules                          |
| <b>N04BC07</b> | 9647R  | Apomorphine               | apomorphine hydrochloride 50 mg/10 mL injection: subcutaneous infusion, 5 x 10 mL syringes |
| <b>N04BC09</b> | 2384L  | Rotigotine                | rotigotine 4 mg/24 hours patch, 28                                                         |
| <b>N04BC09</b> | 2385M  | Rotigotine                | rotigotine 2 mg/24 hours patch, 28                                                         |
| <b>N04BC09</b> | 2410W  | Rotigotine                | rotigotine 6 mg/24 hours patch, 28                                                         |
| <b>N04BD01</b> | 1973W  | Selegiline                | selegiline hydrochloride 5 mg tablet, 100                                                  |
| <b>N04BD02</b> | 1952R  | Rasagiline                | RASAGILINE Tablet 1 mg (as mesilate), 30                                                   |
| <b>N04BX02</b> | 8367J  | Entacapone                | entacapone 200 mg tablet, 100                                                              |
| <b>N04AA02</b> | 2544X  | Biperiden                 | biperiden hydrochloride 2 mg tablet, 100                                                   |
| <b>N04AA01</b> | 1109J  | Benzhexol                 | benzhexol hydrochloride 2 mg tablet, 200                                                   |
| <b>N04AA01</b> | 1110K  | Benzhexol                 | benzhexol hydrochloride 5 mg tablet, 200                                                   |
| <b>N04BC07</b> | 10950H | Apomorphine               | apomorphine hydrochloride 50 mg/10 mL injection, 5 x 10 mL syringes                        |
| <b>N04BC07</b> | 10971K | Apomorphine               | apomorphine hydrochloride 50 mg/10 mL injection, 5 x 10 mL syringes                        |
| <b>N04AC01</b> | 11249C | Benzatropine              | benzatropine mesilate 2 mg/2 mL injection, 5 x 2 mL vials                                  |
| <b>N04AC01</b> | 11255J | Benzatropine              | benzatropine mesilate 2 mg/2 mL injection, 5 x 2 mL vials                                  |
| <b>N04AC01</b> | 11265X | Benzatropine              | benzatropine mesilate 2 mg/2 mL injection, 5 x 2 mL vials                                  |

3

Formatted for BMJ Neurology Open

Version 9.0

|                |        |                      |                                                                                  |
|----------------|--------|----------------------|----------------------------------------------------------------------------------|
| <b>N04BC07</b> | 11083H | Apomorphine          | apomorphine hydrochloride hemihydrate 100 mg/20 mL injection, 5 x 20 mL vials    |
| <b>N04BC07</b> | 11093W | Apomorphine          | apomorphine hydrochloride hemihydrate 100 mg/20 mL injection, 5 x 20 mL vials    |
| <b>N04BC09</b> | 11140H | Rotigotine           | rotigotine 8 mg/24 hours patch, 28                                               |
| <b>N04BA02</b> | 11655K | Levodopa + Carbidopa | levodopa 250 mg + carbidopa 25 mg tablet, 100                                    |
| <b>N04BA02</b> | 11663W | Levodopa + Carbidopa | levodopa 200 mg + carbidopa 50 mg modified release tablet, 100                   |
| <b>N04BC07</b> | 11475Y | Apomorphine          | apomorphine hydrochloride hemihydrate 30 mg/3 mL injection, 5 x 3 mL pen devices |
| <b>N04BC07</b> | 11477C | Apomorphine          | apomorphine hydrochloride hemihydrate 30 mg/3 mL injection, 5 x 3 mL pen devices |
| <b>N04BC07</b> | 11672H | Apomorphine          | apomorphine hydrochloride hemihydrate 30 mg/3 mL injection, 5 x 3 mL cartridges  |
| <b>N04BC07</b> | 11688E | Apomorphine          | apomorphine hydrochloride hemihydrate 30 mg/3 mL injection, 5 x 3 mL cartridges  |
| <b>N04BD03</b> | 11656L | Safinamide           | safinamide 50 mg tablet, 30                                                      |
| <b>N04BD03</b> | 11666B | Safinamide           | safinamide 100 mg tablet, 30                                                     |
| <b>N04BA02</b> | 11890T | Levodopa + Carbidopa | levodopa 200 mg + carbidopa 50 mg modified release tablet, 60                    |
| <b>N04BA02</b> | 11910W | Levodopa + Carbidopa | levodopa 20 mg/mL + carbidopa monohydrate 5 mg/mL intestinal gel, 7 x 100 mL     |
| <b>N04BA02</b> | 11913B | Levodopa + Carbidopa | levodopa 20 mg/mL + carbidopa monohydrate 5 mg/mL intestinal gel, 7 x 100 mL     |
| <b>N04BA02</b> | 11919H | Levodopa + Carbidopa | levodopa 20 mg/mL + carbidopa monohydrate 5 mg/mL intestinal gel, 7 x 100 mL     |
| <b>N04BC07</b> | 12133N | Apomorphine          | apomorphine hydrochloride hemihydrate 30 mg/3 mL injection, 5 x 3 mL cartridges  |
| <b>N04BC07</b> | 12137T | Apomorphine          | apomorphine hydrochloride hemihydrate 30 mg/3 mL injection, 5 x 3 mL pen devices |
| <b>N04BC07</b> | 12142C | Apomorphine          | apomorphine hydrochloride hemihydrate 100 mg/20 mL injection, 5 x 20 mL vials    |
| <b>N04BC07</b> | 12306Q | Apomorphine          | apomorphine hydrochloride hemihydrate 50 mg/5 mL injection, 5 x 5 mL ampoules    |
| <b>N04BC07</b> | 12319J | Apomorphine          | apomorphine hydrochloride hemihydrate 50 mg/10 mL injection, 5 x 10 mL syringes  |
| <b>N04BC07</b> | 12320K | Apomorphine          | apomorphine hydrochloride hemihydrate 20 mg/2 mL injection, 5 x 2 mL ampoules    |

1 Abbreviations: ATC = Anatomical Therapeutic Chemical; PBS = Pharmaceutical Benefits Scheme; SKU =
